# Delirium, Neurotransmission, and Network Connectivity

## The Search for a Comprehensive Pathogenic Framework

THE acute confusional state of delirium remains a key problem in perioperative and critical care medicine.<sup>1</sup> Hampered by a lack of animal models, research is largely restricted to human studies that correlate biomarkers with the incidence and/or duration of delirium. Consequently, there is a lack of mechanistic studies to highlight novel therapies for the condition. Research into delirium is further limited by the lack of a comprehensive framework for its pathogenesis. Such a framework needs to link the features of delirium with two principal determinants of neural function: changes in neurotransmission and neural network connectivity.<sup>2</sup> Of course, studying these factors in the human is complex, particularly if the subject is delirious. These difficulties place even greater burden on clinical studies of sufficient size and rigor to identify pathogenic factors that *may* be manipulated to improve outcomes from delirium.

In this issue of ANESTHESIOLOGY, Hughes *et al.*<sup>3</sup> have provided evidence linking endothelial dysfunction to the risk of delirium. Among many functions, endothelial cells play an important role in controlling both vascular permeability and capillary blood flow. Hughes *et al.*<sup>3</sup> focused on blood flow using the Endo\_PAT device (Itamar Medical Ltd, Franklin, MA) to derive a “reactive hyperemia index,” where lower values reflect greater endothelial dysfunction. For this test, a cuff is inflated on one arm to 50 mmHg above systolic blood pressure, and the other arm serves as a reference. After 5 min of ischemia, the cuff is deflated and difference

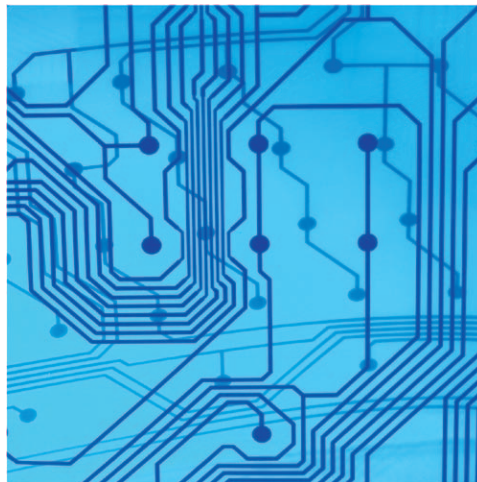

***“... a [comprehensive conceptual] framework needs to link the features of delirium with two principal determinants of neural function: changes in neurotransmission and neural network connectivity.”***

in pulse wave amplitude between the two arms is used to calculate the reactive hyperemia index. The authors show that lower scores on the reactive hyperemia index were associated with an increased risk of acute brain dysfunction, including delirium.

The strengths of the study include the large sample size (147 critically ill patients enrolled with 134 completing the study), the clarity of data reporting, the duration of follow-up, and the diagnosis of delirium using a clinically useful test (the confusion assessment method-intensive care unit).<sup>4</sup> One weakness is that only a single measurement of the Endo\_PAT was taken, an apparent discordance with the long duration of follow-up. Thus, it is unclear whether endothelial function changes in a dynamic manner with the features of delirium. Furthermore, the study suffers from the pervasive problem of linking cause and effect—a difficulty plaguing the field of delirium research as residual confounding

may account for the differences observed. To the authors' credit, they attempt to adjust for confounding variables.<sup>3</sup> As underlying vascular disease may explain both endothelial dysfunction<sup>5</sup> and the risk of delirium,<sup>6</sup> the authors adjusted for the Framingham Stroke risk score.<sup>3</sup> Although this impacted on the results (and may not entirely account for the confounding of vascular disease), endothelial dysfunction was still associated with the acute brain dysfunction. Nonetheless, any causal link between endothelial dysfunction and delirium remains unproven. Furthermore, the authors point out that the Endo\_PAT device only measures a surrogate of endothelial function, and certainly not endothelial function at the blood brain barrier.<sup>3</sup> Therefore, this systemic measure of vascular reactivity may merely reflect the

Photo: ©Thinkstock.

Accepted for publication September 24, 2012. This work was supported by the Medical Research Council, Swindon, United Kingdom, and the Wellcome Trust, London, United Kingdom. There is no direct conflict of interest to report. However Dr. Sanders has received an honorarium for speaking on behalf of Hospira, Chicago, Illinois, about immune effects of sedatives at the Canadian Society of Anesthesiology meeting. Dr. Sanders has also acted as a consultant for Air Liquide, Paris, France, concerning the development of medical gases.

Copyright © 2013, the American Society of Anesthesiologists, Inc. Lippincott Williams & Wilkins. Anesthesiology 2013; 118:494-6

◆ This Editorial View accompanies the following article: Hughes CG, Morandi A, Girard TD, Riedel B, Thompson JL, Shintani AK, Pun BT, Ely EW, Pandharipande PP: Association between endothelial dysfunction and acute brain dysfunction during critical illness. ANESTHESIOLOGY 2013; 118:631–9.

**Table 1.** Examples of Nonmodifiable and Modifiable Risk Factors for Delirium

| Examples of Risk Factors           |                                |
|------------------------------------|--------------------------------|
| Nonmodifiable<br>(Patient Related) | Modifiable<br>(Insult Related) |
| Age                                | Drugs                          |
| Cognitive impairment               | Inflammation/Infection         |
| Dementia                           | Metabolic abnormality          |
| Vascular disease                   | Sleep deprivation              |

generalized illness or inflammation of critical care patients. Despite these concerns, impaired endothelial function may contribute to delirium.<sup>3</sup> An inability to meet the high metabolic demands of neurotransmission, through impaired autoregulation of cerebral blood flow, could lead to many of the neurologic symptoms of delirium.<sup>7</sup> Subsequent changes in neurotransmitter release and receptor expression may further affect neurologic function, especially when combined with other factors such as inflammation, sleep deprivation, or the impact of sedation.<sup>2,8–11</sup>

To provide a more coherent approach to the study of delirium, pathogenic frameworks that account for the cognitive disintegration of the delirium syndrome are required. To have validity, any framework must be consistent with the clinical data that have driven our understanding of the disorder, and it must address how brain function is perturbed at both the synaptic and neural network level. One such framework suggests that the risk of delirium is dependent on: (1) an acute change in inhibitory synaptic signaling, and (2) reduced connectivity of neural networks in the brain.<sup>2</sup> The proposal suggests that the delirium syndrome arises as increased inhibitory tone disintegrates neural networks. Acute (synaptic) changes in  $\gamma$ -aminobutyric acid inhibitory signaling in the brain may be driven by many modifiable risk factors for delirium, such as sedation (table 1). The theory also states that an important factor that determines the risk of delirium is the baseline (preinsult) connectivity in brain neural networks. This connectivity is influenced by many of the predisposing or nonmodifiable risk factors for delirium, such as age or dementia (table 1). For example, an increase in inhibitory tone (*e.g.*, with sedation) may not alone produce delirium, but when allied either with other factors that affect GABAergic signaling (*e.g.*, inflammation) or a predisposing risk factor that affects the baseline connectivity in the brain (*e.g.*, age or dementia), delirium may result.<sup>2</sup> This theory has been subsequently refined to suggest that a parallel increase in aminergic neurotransmission (such as norepinephrine or dopamine) may facilitate interaction with the environment at a reduced state of consciousness, as occurs during delirium.<sup>12</sup> Furthermore, it may be that the balance of excitatory and inhibitory neurotransmission is altered in delirium, hence understanding the role of key excitatory pathways, including those modulated by

acetylcholine,<sup>13</sup> is also required. Similarly, connectivity may be altered differentially between different brain regions with increases and decreases of connectivity possible,<sup>14</sup> perhaps leading to differing symptoms of delirium. Nonetheless, a central theme of altered neurotransmission and network connectivity is emerging. The data provided by Hughes *et al.*<sup>3</sup> may fit within this proposed framework for cognitive disintegration,<sup>2</sup> especially if we consider endothelial dysfunction as part of vascular disease. For example, acutely impaired endothelial function could contribute to changes in neurotransmission due to alterations in energetics,<sup>15,16</sup> whereas vascular disease may affect baseline connectivity in the brain<sup>17,18</sup>; it seems likely that both factors may be important to the pathogenesis of delirium.

Nonetheless, our understanding of delirium remains significantly limited. Importantly, the delirium syndrome comprises hyperactive, hypoactive, and mixed phenotypes; these phenotypes represent different forms of neurologic dysfunction. Until these forms are further dissected, both clinically and mechanistically, the development of therapies for delirium will be impaired. Although the study by Hughes *et al.*<sup>3</sup> has an appropriate sample size for the questions addressed, it is likely underpowered to look at subtypes of delirium. A critical step will be to study each subtype of delirium more closely and to analyze many factors such as comorbidities, endothelial function, sedation, and inflammatory burden in a single study. The critical care community will need to pull together to facilitate such a large, prospective study.

**Robert D. Sanders, B.Sc., M.B.B.S., Ph.D., F.R.C.A.,** Wellcome Department of Imaging Neuroscience, University College London & Magill Department of Anaesthetics, Intensive Care & Pain Medicine, Chelsea & Westminster Hospital, London, United Kingdom. r.sanders@ucl.ac.uk

## References

- Sanders RD, Pandharipande PP, Davidson AJ, Ma D, Maze M: Anticipating and managing postoperative delirium and cognitive decline in adults. *BMJ* 2011; 343:d4331
- Sanders RD: Hypothesis for the pathophysiology of delirium: Role of baseline brain network connectivity and changes in inhibitory tone. *Med Hypotheses* 2011; 77:140–3
- Hughes CG, Morandi A, Girard TD, Riedel B, Thompson JL, Shintani AK, Pun BT, Ely EW, Pandharipande PP: Association between endothelial dysfunction and acute brain dysfunction during critical illness. *ANESTHESIOLOGY* 2013; 118: 631–9
- Ely EW, Inouye SK, Bernard GR, Gordon S, Francis J, May L, Truman B, Speroff T, Gautam S, Margolin R, Hart RP, Dittus R: Delirium in mechanically ventilated patients: Validity and reliability of the confusion assessment method for the intensive care unit (CAM-ICU). *JAMA* 2001; 286:2703–10
- Rudolph JL, Jones RN, Rasmussen LS, Silverstein JH, Inouye SK, Marcantonio ER: Independent vascular and cognitive risk factors for postoperative delirium. *Am J Med* 2007; 120:807–13
- Czosnyka M, Brady K, Reinhard M, Smielewski P, Steiner LA: Monitoring of cerebrovascular autoregulation: Facts, myths, and missing links. *Neurocrit Care* 2009; 10:373–86

7. Sanders RD, Degos V, Young WL: Cerebral perfusion under pressure: Is the autoregulatory 'plateau' a level playing field for all? *Anaesthesia* 2011; 66:968–72
8. Sanders RD, Maze M: Contribution of sedative-hypnotic agents to delirium via modulation of the sleep pathway. *Can J Anaesth* 2011; 58:149–56
9. Pandharipande P, Shintani A, Peterson J, Pun BT, Wilkinson GR, Dittus RS, Bernard GR, Ely EW: Lorazepam is an independent risk factor for transitioning to delirium in intensive care unit patients. *ANESTHESIOLOGY* 2006; 104:21–6
10. Pandharipande PP, Pun BT, Herr DL, Maze M, Girard TD, Miller RR, Shintani AK, Thompson JL, Jackson JC, Deppen SA, Stiles RA, Dittus RS, Bernard GR, Ely EW: Effect of sedation with dexmedetomidine vs lorazepam on acute brain dysfunction in mechanically ventilated patients: The MENDS randomized controlled trial. *JAMA* 2007; 298:2644–53
11. Pandharipande PP, Sanders RD, Girard TD, McGrane S, Thompson JL, Shintani AK, Herr DL, Maze M, Ely EW; MENDS investigators: Effect of dexmedetomidine versus lorazepam on outcome in patients with sepsis: An a priori-designed analysis of the MENDS randomized controlled trial. *Crit Care* 2010; 14:R38
12. Sanders RD, Tononi G, Laureys S, Sleigh JW: Unresponsiveness  $\neq$  unconsciousness. *ANESTHESIOLOGY* 2012; 116:946–59
13. Hsieh TT, Fong TG, Marcantonio ER, Inouye SK: Cholinergic deficiency hypothesis in delirium: A synthesis of current evidence. *J Gerontol A Biol Sci Med Sci* 2008; 63:764–72
14. Choi SH, Lee H, Chung TS, Park KM, Jung YC, Kim SI, Kim JJ: Neural network functional connectivity during and after an episode of delirium. *Am J Psychiatry* 2012; 169:498–507
15. Oja SS, Saransaari P: Release of endogenous amino acids from the striatum from developing and adult mice in ischemia. *Neurochem Res* 2011; 36:1444–51
16. Parsons MP, Hirasawa M: ATP-sensitive potassium channel-mediated lactate effect on orexin neurons: Implications for brain energetics during arousal. *J Neurosci* 2010; 30:8061–70
17. Allan CL, Sexton CE, Kalu UG, McDermott LM, Kivimäki M, Singh-Manoux A, Mackay CE, Ebmeier KP: Does the Framingham Stroke Risk Profile predict white-matter changes in late-life depression? *Int Psychogeriatr* 2011:1–8
18. Sun YW, Qin LD, Zhou Y, Xu Q, Qian LJ, Tao J, Xu JR: Abnormal functional connectivity in patients with vascular cognitive impairment, no dementia: A resting-state functional magnetic resonance imaging study. *Behav Brain Res* 2011; 223:388–94
